1 Benchmark of thirteen bioinformatic pipelines for metagenomic virus diagnostics using datasets  
2 from clinical samples  
3  
4 Jutte J.C. de Vries<sup>1</sup>, Julianne R. Brown<sup>2</sup>, Nicole Fischer<sup>3</sup>, Igor A. Sidorov<sup>1</sup>, Sofia Morfopoulou<sup>2a</sup>, Jiabin  
5 Huang<sup>3</sup>, Bas B. Oude Munnink<sup>4</sup>, Arzu Sayiner<sup>5</sup>, Alihan Bulgurcu<sup>5</sup>, Christophe Rodriguez<sup>6</sup>, Guillaume  
6 Gricourt<sup>6</sup>, Els Keyaerts<sup>7</sup>, Leen Beller<sup>7</sup>, Claudia Bachofen<sup>8</sup>, Jakub Kubacki<sup>8</sup>, Samuel Cordey<sup>9</sup>, Florian  
7 Laubscher<sup>9</sup>, Dennis Schmitz<sup>10</sup>, Martin Beer<sup>11</sup>, Dirk Hoepfer<sup>11</sup>, Michael Huber<sup>12</sup>, Verena Kufner<sup>12</sup>,  
8 Maryam Zaheri<sup>12</sup>, Aitana Lebrand<sup>13</sup>, Anna Papa<sup>14</sup>, Sander van Boheemen<sup>4</sup>, Aloys C.M. Kroes<sup>1</sup>, Judith  
9 Breuer<sup>2, 2a</sup>, F. Xavier Lopez-Labrador<sup>15, 16</sup>, Eric C.J. Claas<sup>1</sup>, on behalf of the ESCV Network on Next-  
10 Generation Sequencing

11 Word count: 2431

12 Author contributions: Conceptualization: JV, EC. Methodology: JV, EC, FXL, NF, IS, BO, SB. Data  
13 analysis: JV, JuB, NF, IS, SM, JH, BO, AS, AB, CR, GG, EK, LB, CB, JK, SC, FL, DS, MB, DH, MH, VK, MZ,  
14 AL, AP. Visualization: JV, AL. First draft: JV. Reviewing and editing: all authors

15

16 <sup>1</sup> Clinical Microbiological Laboratory, department of Medical Microbiology, Leiden University Medical  
17 Center, Leiden, the Netherlands; [jjcdevries@lumc.nl](mailto:jjcdevries@lumc.nl), [I.A.Sidorov@lumc.nl](mailto:I.A.Sidorov@lumc.nl), [A.C.M.Kroes@lumc.nl](mailto:A.C.M.Kroes@lumc.nl),  
18 [E.C.J.Claas@lumc.nl](mailto:E.C.J.Claas@lumc.nl)

19 <sup>2</sup> Microbiology, Virology and Infection Prevention & Control, Great Ormond Street Hospital for  
20 Children NHS Foundation Trust, London, United Kingdom; [julianne.brown@gosh.nhs.uk](mailto:julianne.brown@gosh.nhs.uk),  
21 [breuej@gosh.nhs.uk](mailto:breuej@gosh.nhs.uk)

22 <sup>2a</sup> Division of Infection and Immunity, University College London, London, United Kingdom;  
23 [sofia.morfopoulou.10@ucl.ac.uk](mailto:sofia.morfopoulou.10@ucl.ac.uk)

24 <sup>3</sup> University Medical Center Hamburg-Eppendorf, UKE Institute for Medical Microbiology, Virology  
25 and Hygiene, Germany; [nfischer@uke.de](mailto:nfischer@uke.de), [j.huang@uke.de](mailto:j.huang@uke.de)

26 <sup>4</sup> Viroscience, Erasmus Medical Center, Rotterdam, the Netherlands;  
27 [b.oudemunnink@erasmusmc.nl](mailto:b.oudemunnink@erasmusmc.nl), [s.vanboheemen@erasmusmc.nl](mailto:s.vanboheemen@erasmusmc.nl)

28 <sup>5</sup> Dokuz Eylul University, Medical Faculty, Izmir, Turkey; [arzu.sayiner@deu.edu.tr](mailto:arzu.sayiner@deu.edu.tr),  
29 [alihanbulgurcu@gmail.com](mailto:alihanbulgurcu@gmail.com)

30 <sup>6</sup> Hospital Henri Mondor, Paris, France; [christophe.rodriquez@aphp.fr](mailto:christophe.rodriquez@aphp.fr), [guillaume.gricourt@aphp.fr](mailto:guillaume.gricourt@aphp.fr)

31 <sup>7</sup> Laboratory of Clinical and Epidemiological Virology (Rega Institute), KU Leuven, Belgium;  
32 [els.keyaerts@kuleuven.be](mailto:els.keyaerts@kuleuven.be), [leen.beller@kuleuven.be](mailto:leen.beller@kuleuven.be)

33 <sup>8</sup> Institute of Virology, University of Zurich, Switzerland; [claudia.bachofen@uzh.ch](mailto:claudia.bachofen@uzh.ch),  
34 [jakub.kubacki@uzh.ch](mailto:jakub.kubacki@uzh.ch)

35 <sup>9</sup> Laboratory of Virology, University Hospitals of Geneva, Geneva, Switzerland;  
36 [Samuel.Cordey@hcuge.ch](mailto:Samuel.Cordey@hcuge.ch), [Florian.Laubscher@hcuge.ch](mailto:Florian.Laubscher@hcuge.ch)

37 <sup>10</sup> RIVM National Institute for Public Health and Environment, Bilthoven, the Netherlands;  
38 [Dennis.Schmitz@RIVM.nl](mailto:Dennis.Schmitz@RIVM.nl)

39 <sup>11</sup> Friedrich-Loeffler-Institute, Institute of Diagnostic Virology, Greifswald, Germany;  
40 [martin.beer@fli.de](mailto:martin.beer@fli.de), [dirk.hoeper@fli.de](mailto:dirk.hoeper@fli.de)

41 <sup>12</sup> Institute of Medical Virology, University of Zurich, Switzerland; [huber.michael@virology.uzh.ch](mailto:huber.michael@virology.uzh.ch),  
42 [kufner.verena@virology.uzh.ch](mailto:kufner.verena@virology.uzh.ch), [zaheri.maryam@virology.uzh.ch](mailto:zaheri.maryam@virology.uzh.ch)

43 <sup>13</sup> Swiss Institute of Bioinformatics, Geneva, Switzerland; [aitana.lebrand@sib.swiss](mailto:aitana.lebrand@sib.swiss)

44 <sup>14</sup> Department of Microbiology, Medical School, Aristotle University of Thessaloniki, Greece;  
45 [annap@auth.gr](mailto:annap@auth.gr)

46 <sup>15</sup> Virology Laboratory, Genomics and Health Area, Center for Public Health Research (FISABIO-Public  
47 Health), Generalitat Valenciana and Microbiology & Ecology Department, University of Valencia,  
48 Spain; F.Xavier.Lopez@uv.es

49 <sup>16</sup> CIBERESP, Instituto de Salud Carlos III, Spain; F.Xavier.Lopez@uv.es

50

51

52 Abstract

53 Metagenomic sequencing is increasingly being used in clinical settings for difficult to diagnose cases.  
54 The performance of viral metagenomic protocols relies to a large extent on the bioinformatic  
55 analysis. In this study, the European Society for Clinical Virology (ESCV) Network on NGS (ENNGS)  
56 initiated a benchmark of metagenomic pipelines currently used in clinical virological laboratories.

57 Methods

58 Metagenomic datasets from 13 clinical samples from patients with encephalitis or viral respiratory  
59 infections characterized by PCR were selected. The datasets were analysed with 13 different  
60 pipelines currently used in virological diagnostic laboratories of participating ENNGS members. The  
61 pipelines and classification tools were: Centrifuge, DAMIAN, DIAMOND, DNASTAR, FEVIR, Genome  
62 Detective, Jovian, MetaMIC, MetaMix, One Codex, RIEMS, VirMet, and Taxonomer. Performance,  
63 characteristics, clinical use, and user-friendliness of these pipelines were analysed.

64 Results

65 Overall, viral pathogens with high loads were detected by all the evaluated metagenomic pipelines.  
66 In contrast, lower abundance pathogens and mixed infections were only detected by 3/13 pipelines,  
67 namely DNASTAR, FEVIR, and MetaMix. Overall sensitivity ranged from 80% (10/13) to 100% (13/13  
68 datasets). Overall positive predictive value ranged from 71-100%. The majority of the pipelines  
69 classified sequences based on nucleotide similarity (8/13), only a minority used amino acid similarity,  
70 and 6 of the 13 pipelines assembled sequences *de novo*. No clear differences in performance were  
71 detected that correlated with these classification approaches. Read counts of target viruses varied  
72 between the pipelines over a range of 2-3 log, indicating differences in limit of detection.

73 Conclusion

74 A wide variety of viral metagenomic pipelines is currently used in the participating clinical diagnostic  
75 laboratories. Detection of low abundant viral pathogens and mixed infections remains a challenge,  
76 implicating the need for standardization and validation of metagenomic analysis for clinical  
77 diagnostic use. Future studies should address the selective effects due to the choice of different  
78 reference viral databases.

79

80

81

82 Introduction

83 Viral metagenomic next-generation sequencing (mNGS) is increasingly being used in virology  
84 laboratories for the diagnosis of patients with suspected but unexplained infectious diseases. The  
85 current main clinical application of viral metagenomics is for diagnosing encephalitis of unknown  
86 cause [1, 2], but metagenomic sequencing is considered useful in a growing number of other clinical  
87 syndromes [3-6]. Although many wet-lab challenges need to be faced as well [14], the performance  
88 of metagenomic methods is largely dependent on accurate bioinformatic analysis, and both  
89 classification algorithms and databases are crucial factors determining the overall performance of  
90 the pipelines [7] [55]. A wide range of metagenomic pipelines and taxonomic classifiers have been  
91 developed, commonly for the purpose of biodiversity studies analysing the composition of the  
92 microbiome in different cohorts. In contrast, when applying metagenomics to patient diagnostics,  
93 potential false-negative and false-positive bioinformatic classification results can have significant  
94 consequences for patient care. Most reports on bioinformatic tools for metagenomic analysis for  
95 virus diagnostics typically describe algorithms and validations of single in-house developed pipelines  
96 developed by the authors themselves [8-12]. Most reports on bioinformatic tools for metagenomic  
97 analysis for virus diagnostics typically describe algorithms and validations of single in-house  
98 developed pipelines developed by the authors themselves [13], and recently a metagenomic  
99 benchmarking trial among Swiss virology laboratories has been conducted [7]. Recently, ESCV  
100 Network on NGS (ENNGS) recommendations for the introduction of next-generation sequencing in  
101 clinical virology, part II: bioinformatic analysis and reporting were published [55], aiming to address  
102 the challenges involved. While a professional External Quality Assessment (EQA) program is  
103 currently in preparation by Quality Control for Molecular Diagnostics (QCMD), the ENNGS [14] [55]  
104 conducted the presented benchmark of bioinformatic pipelines of the participating diagnostic  
105 laboratories using viral metagenomic datasets derived from clinical samples, in order to assist  
106 laboratories with selection and optimization of tools to be implemented for clinical use.

107 Methods

108 Datasets

109 To exclude differences in wet-lab procedures, the same raw, untrimmed metagenomic datasets  
110 were provided, so that the participants had standardized datasets for bioinformatic analysis.

111 In total, 13 clinical metagenomic datasets from samples well-characterized by RT-PCR [15-18] were  
112 selected from patients with encephalitis or respiratory complaints, including: cerebrospinal fluid  
113 (CSF, n=4), brain biopsies (n=3), nasopharyngeal swabs (n=3), nasal washings (n=1), bronchoalveolar  
114 lavage (n=1), and a plasma sample (n=1). RT-PCR panel results and Cq-values are included in the  
115 result section. The pathogens in the 13 datasets are depicted in Table 2.

116 For samples processed at the Great Ormond Street Hospital, London (GOSH), mRNA from the three  
117 brain biopsy samples was sequenced on an Illumina NextSeq500 instrument using an 81 bp paired-  
118 run after library preparation using Illumina's TruSeq Stranded mRNA LT sample preparation kit (p/n  
119 RS-122-2101) according to the manufacturer's instructions [19]. The other samples were spiked with  
120 Equine Arteritis Virus (EAV) and Phocid Herpes Virus (PhHV) internal controls preceding total nucleic  
121 acid extraction using the MagNA Pure 96 DNA and Viral NA Small Volume Kit (Roche Diagnostics,  
122 Almere, the Netherlands) and sequenced on Illumina NextSeq500 (respiratory samples) or  
123 NovaSeq6000 (CSF samples, plasma) instruments using 150 bp paired-end runs after library  
124 preparation using New England BioLabs' NEBNext Ultra Directional RNA Library preparation kit for  
125 Illumina with in-house adaptations in order to enable simultaneous detection of both DNA and RNA  
126 viruses, at the Leiden University Medical Center (LUMC) [4, 20]. Three of the CSF samples were  
127 sequenced after enrichment using capture probes targeting vertebrate viruses [21]. Human reads  
128 from the output FASTQ files were removed after mapping them to human reference genome  
129 GRCh38 [22] with Bowtie2 version 2.3.4 [23] before the datasets were uploaded to various data  
130 sharing platforms (see below).

131

132 Data sharing

133 The FASTQ datasets were and remain publicly available for user-friendly downloading at

134 <https://veb.lumc.nl/CliniMG> (hosted by the dept. MM, LUMC, Leiden), and part of the datasets were

135 additionally accessible via a COMPARE Data Hub at <http://www.ebi.ac.uk/ena/pathogens> (hosted by

136 the European Bioinformatics Institute, EMBL-EBI) [24].

137

138 Bioinformatic pipelines

139 The datasets were analysed in a blinded fashion by the participants, with the (viral) metagenomic

140 pipelines and classification tools (**Figure 1 and Table 1**) used at their diagnostic laboratories:

141 Centrifuge [25], DAMIAN [26, 27], DIAMOND [28], DNASTAR [29], FEVIR [30], Genome Detective

142 [31], Jovian [32], MetaMIC [33], MetaMix [34, 35], One Codex [36], RIEMS [37, 38], Taxonomer [39],

143 and VirMet [40]. DAMIAN was run by two participants in combination with a different database

144 (pipeline A and B), and one participant run both Centrifuge and GenomeDetective. Details of the

145 algorithms are described in **Table 1**.

146

147 Performance characteristics

148 Both qualitative and quantitative performance of the pipelines were analysed with real-time PCR

149 results as gold standard. The following parameters available for all pipelines were considered:

150 pathogen detection, taxonomic classification level and target read count. Additionally, horizontal

151 genome coverage (if available), computational time, user-friendliness and output formats were

152 considered. Since EAV and PhHV were added as internal controls and not reported by the



153 participants (due to default reporting criteria, or absence in the database)they were not included in  
154 the comparative analysis.

155 Results

156 Metagenomic pipeline characteristics

157 In total 13 different metagenomic pipelines and classification tools were in use in the 13  
158 participating diagnostic laboratories. Clinical use, classification and output characteristics of the  
159 pipelines and tools utilized are shown in **Figure 1** and **Table 1**. The majority of the pipelines were  
160 developed or adapted at a local site, while four pipelines were commercially available and web-  
161 based: DNASTAR (Madison, WI, USA), Genome Detective (Emweb bv, Herent, Belgium), One Codex  
162 (San Francisco, USA), and Taxonomer (Utah, USA). DAMIAN and Centrifuge are publicly available as  
163 an open source software. Both classification tools and reference databases differed among  
164 participants (and were fixed for end-users of the commercially available pipelines); (adapted  
165 versions of) NCBI's nucleotide and RefSeq databases were most commonly used to generate  
166 reference databases. Six of the 13 pipelines assembled sequence reads *de novo*, whereas the others  
167 classified unassembled reads. The majority of the pipelines classified reads based on nucleotide  
168 similarity (8/13), and a minority used amino acid similarity (2/13), or a combination of both (3/13  
169 pipelines). Parameters used by the participants for defining a positive result were the number of  
170 virus reads, horizontal genome coverage (some of the participants), and a cut-off based on  
171 posterior-probability scores of the species presence (MetaMix) and ROC-curves. Output formats  
172 varied, the majority had a user-friendly output format: excel, PDF or interactive webpage. Examples  
173 of these user-friendly output formats are shown in **Supplementary Figure S1**.

174

175 Detection of PCR targeted viral pathogens; sensitivity

176 The qualitative and quantitative results of the pipeline benchmarking for viruses detected by RT-PCR  
177 are shown in **Table 2** and **Figure 2**. Overall, higher abundance viral pathogens (Cq-value < 28) were  
178 detected by all metagenomic pipelines evaluated. In contrast, viral pathogens with RT-PCR Cq-value

179 of 28 and higher including mixed virus infections were only detected by 3/13 pipelines, namely  
180 DNASTAR, FEVIR, and MetaMix. Although participants analysed the same FASTQ files, read counts of  
181 the target viruses varied from one to several orders of magnitude across pipelines. Also, read counts  
182 (all datasets combined) achieved by participants did not correlate well with the viral load as  
183 measured by RT-PCR ( $R=-0.07$ , P-value 0.5), however it must be noted that wet lab procedures  
184 varied per set of samples, including protocols with and without viral enrichment, which had  
185 potential impact on the viral read counts and thus on correlation with Cq-values. Overall sensitivity  
186 of the pipelines at sample level was 77% (10/13) - 100% (13/13 samples, mixed infections counted as  
187 one) (**Table 2 and Supplementary Table 2**). At viral mNGS hit level, overall sensitivity was 80%  
188 (12/15) - 100% (15/15 viral hits) (**Supplementary Table 4**). One of the participants reported  
189 normalized reads including the genome length, using the following formula:  $RPKM = (\text{number of}$   
190  $\text{reads mapped to virus genome } Y * 10^6) / (\text{total number of reads} * \text{length of genome in kp})$ . This  
191 formula was also used to normalize the reads of all study pipelines shown in Figure 2.

192

193 Taxonomic level of classification

194 The taxonomic levels of classification and typing of pathogenic viruses by the metagenomic pipelines  
195 with the settings used and reported by the participants are shown in **Figure 3** and **Supplementary**  
196 **Table 3**. The classification level is dependent on the database used, algorithm settings (classification  
197 of reads to the lowest common ancestor, LCA, in case of multiple hits), and the participant's default  
198 reporting levels based on either in-house validation data or clinical relevancy. Species level  
199 classification was the most common level reported. Serotype and strain level were identified by  
200 tools that were combined with NCBI's nt database without the LCA setting. DAMIAN was the only  
201 tool to report classification at the isolate level.

202 For the Adenovirus sample (#13), virus types reported were not consistent between different  
203 pipelines: human Adenovirus type 31 (DIAMOND, Jovian, DNASTAR, VirMet), type 12 (DAMIAN), type  
204 31 or 61 (metaMIC), indicating that type classification was not always correct. Type 12 and 31 are  
205 both from subgroup A Adenoviruses, whereas type 61 is a type 31 recombinant virus.

206

207 Additional virus hits and positive predictive value

208 Additional viruses, either not tested for by RT-PCR or RT-PCR negative were reported by 11 out of 13  
209 pipelines, and in one or more samples (**Supplementary Table 4**). The following additional viruses  
210 were reported by multiple pipelines and absent in the negative run control (dataset not available for  
211 the participants): human retrovirus RD114 (2-2102 reads, up to 28% genome coverage), feline  
212 leukemia virus (2-1406 reads), torque-teno virus (TTV) (18-66 reads, up to 7% genome coverage),  
213 polyomaviruses (5-41 reads, up to 37% genome coverage), Bovine viral diarrhea virus (BVDV) (6-220  
214 reads, likely FBS contaminants), human metapneumovirus (HMPV) (15-21 reads, 9% genome  
215 coverage), human rhinovirus (HRV) (2-4 reads, up to 5% genome coverage), human  
216 parainfluenzavirus-4 (PIV-4) (2-6 reads) and Dengue virus (18-370 reads). RT-PCR data were available  
217 for some of the additional viruses detected (**Supplementary Table 4**). When considering viral mNGS  
218 hits with negative RT-PCR results: CoV-NL63 (1 read), PIV-4 (2-6 reads), HRV-C (2-4 reads), CoV-OC43  
219 (5 reads), INF-B (2 reads), the positive predictive value ranged from 71-100% (**Figure 4**). It must be  
220 noted that for these mNGS hits, no distinction could be made between assignments of sequences  
221 genuinely present e.g. by index hopping (which was suspected given the low number of reads), false  
222 negative by PCR due to primers/probes mismatches, and false positive assignments. When  
223 considering the mNGS findings without available RT-PCR results, retrovirus RD114, leukemia viruses,  
224 TTV, and polyomaviruses sequences may actually be present given their association with the host  
225 (integrated or commensal).

226

227 Reporting criteria

228 Reporting criteria used by the participants are shown in **Table 1**: a threshold for number of reads, for  
229 genome coverage (number of nucleotides and proportion of the genome, or a certain number of  
230 genome regions covered), based on reference or in-house validation studies. A BLAST analysis of  
231 matching sequences was commonly used by the study participants to exclude false positive (or to  
232 confirm true positive) hits. Some participants indicated that for clinical samples outside of the  
233 current benchmark, they required a confirmatory PCR before reporting while others indicated that  
234 this was not needed based on experiences from their validation studies.

235

236 Discussion

237 This study aimed to benchmark the combination of bioinformatic tools and databases currently in  
238 use in diagnostic virology laboratories from the ESCV ENNGS network. The data presented here  
239 support bioinformatic selection and optimization of software for the implementation of viral  
240 metagenomic sequencing for pathogen detection in clinical samples. To our knowledge, this is the  
241 first large-scale international benchmarking study using datasets from clinical samples and pipelines  
242 currently applied in a large series of clinical diagnostic laboratories.

243 The study showed that the pipelines of all the participating laboratories succeeded in detecting viral  
244 pathogens with relative high viral loads (Cq-values <28), whereas lower abundant pathogens and  
245 mixed infections were only detected by some of the pipelines, namely DNASTAR, FEVIR, and  
246 MetaMix. These results are in line with other reports [7]. With regard to mixed infections, the less  
247 abundant viruses were generally missed, possibly due to the low number of reads, or reporting  
248 considerations. For the missed CoV-HKU1 virus, potential primer cross-reactivity with CoV-NL63  
249 viruses was excluded by *in silico* analysis. The databases used in the pipelines were mostly custom-  
250 made, based on either NCBI's RefSeq [41] or nt database [42]. All of the participants used different  
251 classification tools, though no selection of laboratories using different tools was made in advance.  
252 Given the inclusion of different types of pipelines including commercially available ones with fixed  
253 databases, it was not feasible to compare the different tools with one standardised database at the  
254 local sites. Two of the three pipelines that reached 100% sensitivity included NCBI's nt database but  
255 this was also seen using a pipeline with NCBI's RefSeq database. Pipelines with NCBI's nt database  
256 scored both low and maximum precision. The design did allow for comparison of the complete  
257 pipeline in use for clinical diagnostics, from QC to reporting algorithms including posterior  
258 probability scores. No clear differences were observed in terms of performance based on nucleotide-  
259 based classification versus amino acid-based classification and *de novo* assembly-based algorithms  
260 versus read based classification: whereas amino-acid based classification may be more sensitive for

261 detecting variants, two of the three pipelines with 100% sensitivity used nucleotide-based  
262 classification (DNASTAR, FEVIR). High precision was reached by pipelines that used *de novo* assembly  
263 but this was not essential: 3/8 pipelines with 100% precision did not use *de novo* assembly  
264 (Centrifuge, Taxonomer, One Codex).

265 Reported read counts and genome coverage varied between pipelines up to several orders of  
266 magnitude (for read counts), explaining in part the differences observed in limits of detection for  
267 samples with very low viral load. Possibly, differences in reporting of unique versus non-uniquely  
268 mapped sequence reads may be related to this difference. Sensitivity and positive predictive value  
269 were measured, conveniently avoiding the proportion of true negative findings given the immense  
270 but unknown number of negative mNGS hits without RT-PCR data needed for specificity calculations.  
271 This aspect remains a limitation intrinsically linked to mNGS validations with clinical datasets, though  
272 datasets from negative matrix samples and/or negative controls would have been contributable for  
273 specificity calculations and correction for contaminants by the participants respectively. Positive  
274 predictive value calculations were hampered by the intrinsic inability to distinguish between  
275 sequences actually present in the dataset that might be undetected by RT-PCR because, for instance,  
276 primer mismatches, index hopping or contaminant sequences introduced during library  
277 preparation. This may partially be overcome by defining mNGS consensus results as alternative  
278 golden standard, however in diagnostic settings e.g. index hopping reads should not be labelled  
279 positive despite being actually present in the dataset. A study design using synthetic datasets this  
280 may enable a more accurate estimation of the specificity and PPV *in silico* however these estimates  
281 would deviate significantly from the ones in real-life conditions, where has to be dealt with  
282 interfering factors such as the 'kitome', present in every single dataset. The current comparison  
283 aimed at the entire bioinformatic workflow including thresholds for reporting and corrections for  
284 interfering real-life factors.

285 It is important to note that participants likely have optimized their interpretation algorithm including  
286 cut-offs for their specific workflow from library preparation to sequencing. A different wet lab  
287 procedure (sequencer with or without index hopping, preparation with or without probe  
288 enrichment) will require new validation and indexing of the determined cut-off values and  
289 probability values. Because this was a dry lab comparison exercise, the participants could not follow  
290 their routine wet lab workflow and confirmatory PCR steps, which may have affected the reporting  
291 of results. Therefore no conclusions can be drawn on the limit of detection of the full metagenomic  
292 workflows used in each specific laboratory.

293 Genome coverage and depth was not always taken into account by the participating laboratories,  
294 however can be an effective parameter to distinguish between (PCR-)contaminants, often indicated  
295 by high depth at a small (PCR amplicon) region of the genome, and true positives [21, 55]. In five of  
296 participating laboratories a cut-off of one single read was chosen for defining a positive mNGS result.  
297 While potentially at higher risk of reporting false positive results, the PPV of these pipelines ranged  
298 from 72 up to 100%, indicating that this cut-off was dependent on the overall steps of the analysis  
299 and reporting. ROC analysis was used to find the optimal balance between sensitivity and specificity  
300 [20].

301 Finally, our taxonomic results are in line with data available from other groups [43]: the pipelines  
302 performed well at species level but deeper level classification was subject to less reliable  
303 classification in some cases.

304 In conclusion, a wide variety of viral metagenomic pipelines with overall high sensitivity are currently  
305 used in the ESCV ENNGS participating clinical diagnostic laboratories. Detection of low abundance  
306 viral pathogens or mixed infections remains a challenge, implicating the need for standardization  
307 and validation of metagenomic analysis for clinical diagnostic use [44]. The algorithm for defining  
308 positive results and rejecting false positive results is critical and should be evaluated individually for  
309 every workflow, which includes genome extraction, library preparation, sequencer and bioinformatic



310 pipeline. Identification of deeper taxonomic levels is challenging, dependent on the individual types

311 present in the reference database, and should be validated separately to prevent misidentification.

312

313

314 Acknowledgements

315 We thank the COMPARE study group (<https://www.compare-europe.eu/>) and the EMBL-EBI  
316 (<https://www.ebi.ac.uk/>) for the availability of the Data Hubs.

317

318 Funding

319 MH was supported by the Clinical Research Priority Program 'Comprehensive Genomic Pathogen  
320 Detection' of the University of Zurich

321 FXL receives funding from Instituto de Salud Carlos III, Spain (Grant numbers PI18/01824 and  
322 PI18/01759 and CIBEResp).

323

324 Conflict of interest: none

| Pipeline no (alphabetical order)                              | 1                                                                       | 2                                       | 3 and 3A                                                                       | 4                              | 5                                              | 6                                                                     | 7                                              | 8                                                              | 9                                                            | 10                                                                  | 11                              | 12                              | 13                                                                            |
|---------------------------------------------------------------|-------------------------------------------------------------------------|-----------------------------------------|--------------------------------------------------------------------------------|--------------------------------|------------------------------------------------|-----------------------------------------------------------------------|------------------------------------------------|----------------------------------------------------------------|--------------------------------------------------------------|---------------------------------------------------------------------|---------------------------------|---------------------------------|-------------------------------------------------------------------------------|
| <b>Classification tool or pipeline</b>                        | Centrifuge [25] v1.0.1-beta                                             | DAMIAN [26, 27] v190628                 | DIAMOND [28] v0.9.13.114                                                       | DNASTAR [29] Lasergene v16     | FEVIR [30] V1                                  | Genome Detective [31] v1.110                                          | Jovian [32] V0.9.6                             | MetaMIC [33] v2.1.1                                            | MetaMix [34] [35] v1.2                                       | One Codex [36] v1                                                   | RIEMS [37, 38] v4.0             | Taxonomer [39] 2020-U           | VirMet [40] v1.1.1                                                            |
| <b>Clinical usage by participant</b>                          | Patient care                                                            | Experimental                            | Experimental                                                                   | Patient care                   | Patient care                                   | Patient care <sup>a</sup>                                             | Patient care                                   | Patient care <sup>a</sup>                                      | Patient care <sup>a</sup>                                    | Experimental                                                        | Patient care                    | Experimental                    | Patient care                                                                  |
| <b>In-house/commercially available</b>                        | Open-source software                                                    | Open-source software                    | In-house                                                                       | Commercial                     | In-house                                       | Commercial                                                            | In-house                                       | In-house                                                       | In-house                                                     | Commercial                                                          | In-house                        | Commercial                      | In-house                                                                      |
| <b>Local/web-based</b>                                        | Local                                                                   | Local                                   | Local                                                                          | Local (cloud optional)         | Local                                          | Web-based                                                             | Local                                          | Local                                                          | Web-based (hosted on Bluebee)                                | Web-based                                                           | Local                           | Web-based                       | Local                                                                         |
| <b>De novo assembly</b>                                       | N                                                                       | Y                                       | Y [45]                                                                         | N (optional)                   | N                                              | Y                                                                     | Y                                              | Y                                                              | Y                                                            | N                                                                   | Y                               | N                               | N                                                                             |
| <b>Alignment of NT/ AA</b>                                    | NT                                                                      | NT, AA                                  | AA                                                                             | NT                             | NT                                             | NT, AA                                                                | NT                                             | NT                                                             | AA                                                           | NT                                                                  | NT                              | NT, AA                          | NT                                                                            |
| <b>Database used by participant viral/bacterial (version)</b> | Viruses, bacteria, fungi, archae; RefSeq (compressed index) V2019-04-04 | NCBI's nt and nr v2019-05-17, PFAM 30.0 | Viruses; NCBI's non-redundant protein database/ pipeline 3B: NCBI's nt V0.9.22 | Based on NCBI's nt V2020-01-08 | Viruses; based on Virosaurus [46] v90v_2018_11 | Viruses; based on RefSeq (filtering: Swissprot Uniref 90) v2018-11-14 | NCBI's nt, v2019-11-30 a.o. (compressed index) | Bacteria, viruses, fungi; v2.1.1 based on NCBI's nt (complete) | Human, Environmental, bacteria, Viruses RefSeq protein v2017 | Bacteria, viruses, fungi, archaea, protozoa, One Codex DB v2019-5-1 | NCBI's nt (complete) v2019-3-16 | Based on NCBI's nt (v May 2019) | Based on NCBI's nt (selection of viral full genomes without compression) v224 |
| <b>Paired reads as input option</b>                           | Y                                                                       | Y                                       | Y                                                                              | Y                              | Y                                              | Y                                                                     | Y                                              | Y                                                              | Y                                                            | Y                                                                   | Y                               | N                               | N                                                                             |
| <b>Trimming and QC tools</b>                                  | Trimmomatic                                                             | Trimmomatic                             | Trimmomatic [47]                                                               | Included in DNASTAR            | Included in virusscan [48] 1.0                 |                                                                       | Trimmomatic, fastqc, multiqc                   | HMN Trimmer                                                    | TrimGalore!, prinseq                                         | Cutadapt                                                            | Roche 454 newbler               | N                               | Seqtk, prinseq                                                                |
| <b>Exclusion of human reads</b>                               | N                                                                       | Y                                       | N/pipeline 3B:Y <sup>b</sup>                                                   | Y                              | N                                              | Y                                                                     | Y                                              | Y                                                              | Y                                                            | Y                                                                   | N                               | N                               | Y                                                                             |
| <b>Output</b>                                                 | Script,                                                                 | Excel                                   | Script,                                                                        | User-                          | Script                                         | Web                                                                   | Web                                            | PDF                                                            | Web                                                          | Web                                                                 | PDF                             | Web                             | PDF                                                                           |

| type                                                  | Krona                         |                              | krona                         | friendly                      |                              | interface, interactive       | interface, interactive     |                                                | interface, interactive, PDF and excel                  | interface, interactive, PDF and excel |                         | interface, interactive     |                                                    |
|-------------------------------------------------------|-------------------------------|------------------------------|-------------------------------|-------------------------------|------------------------------|------------------------------|----------------------------|------------------------------------------------|--------------------------------------------------------|---------------------------------------|-------------------------|----------------------------|----------------------------------------------------|
| Visualization of genome coverage                      | N                             | N                            | N                             | Y                             | N                            | Y                            | N                          | N                                              | N<br>(CLC Genomics Workbench)                          | N                                     | Y                       | N (free version)/ Y (paid) | Y                                                  |
| Computational time for analysis per sample (CPU/RAM)  | ~10 min (24 CPUs, 0.3 GB RAM) | 90 min (56 CPUs, 125 GB RAM) | 90min (36 CPUs, RAM=23 gb)    | 3 min (4 CPUs, 64 GB RAM)     | 1 min (176 CPUs, 384 GB RAM) | ~10 min (web-based)          | 12 min (20 CPUs, U GB RAM) | 18 min (U CPUs, U GB RAM)                      | 60-180 min (web-based)                                 | 35-40 min (web-based)                 | U (48 CPUs, 768 GB RAM) | 10 min (web-based)         | 20 min (16 CPUs, 64 GB RAM)                        |
| Cut-off for defining positive result used             | ≥15 reads [20]                | Contig length => 400 bp      | 1 read                        | 1 read                        | ≥300 nt coverage             | ≥3 regions, distributed [49] | U                          | Above background : environmental sample        | ≥3 regions >10 reads [50] [51] Probability score       | 1 read                                | 1 read                  | 1 read                     | ≥3 reads, distributed, >100x than NC/other samples |
| Confirmatory analysis required for clinical reporting | BLAST, PCR                    | PCR for clinical cases       | BLAST, PCR for clinical cases | BLAST, PCR for clinical cases | BLAST                        | U                            | U                          | PCR not required (based on validation) [52-54] | BLAST, coverage (PCR not required based on validation) | Not required                          | BLAST, PCR              | BLAST                      | U                                                  |

**Table 1. Clinical use, classification and output characteristics of metagenomic pipelines analysed.**

<sup>a</sup> Within the scope of accreditation

<sup>b</sup> Mapping of the trimmed reads to HG38 by Bowtie with “very-sensitive” option

AA; amino acid, NT; nucleotide, U; Undisclosed

## References

1. Brown, J.R., T. Bharucha, and J. Breuer, *Encephalitis diagnosis using metagenomics: application of next generation sequencing for undiagnosed cases*. J Infect, 2018. **76**(3): p. 225-240.
2. Wilson, M.R., et al., *Clinical Metagenomic Sequencing for Diagnosis of Meningitis and Encephalitis*. N Engl J Med, 2019. **380**(24): p. 2327-2340.
3. Jerome, H., et al., *Metagenomic next-generation sequencing aids the diagnosis of viral infections in febrile returning travellers*. J Infect, 2019. **79**(4): p. 383-388.
4. van Boheemen, S., et al., *Retrospective Validation of a Metagenomic Sequencing Protocol for Combined Detection of RNA and DNA Viruses Using Respiratory Samples from Pediatric Patients*. J Mol Diagn, 2020. **22**(2): p. 196-207.
5. Lewandowska, D.W., et al., *Metagenomic sequencing complements routine diagnostics in identifying viral pathogens in lung transplant recipients with unknown etiology of respiratory infection*. PLoS One, 2017. **12**(5): p. e0177340.
6. Kufner, V., et al., *Two Years of Viral Metagenomics in a Tertiary Diagnostics Unit: Evaluation of the First 105 Cases*. Genes (Basel), 2019. **10**(9).
7. Junier, T., et al., *Viral Metagenomics in the Clinical Realm: Lessons Learned from a Swiss-Wide Ring Trial*. Genes (Basel), 2019. **10**(9).
8. Chen, J., J. Huang, and Y. Sun, *TAR-VIR: a pipeline for TARgeted VIRal strain reconstruction from metagenomic data*. BMC Bioinformatics, 2019. **20**(1): p. 305.
9. Miller, S., et al., *Laboratory validation of a clinical metagenomic sequencing assay for pathogen detection in cerebrospinal fluid*. Genome Res, 2019. **29**(5): p. 831-842.
10. Paez-Espino, D., et al., *Nontargeted virus sequence discovery pipeline and virus clustering for metagenomic data*. Nat Protoc, 2017. **12**(8): p. 1673-1682.
11. Li, Y., et al., *VIP: an integrated pipeline for metagenomics of virus identification and discovery*. Sci Rep, 2016. **6**: p. 23774.
12. Nooij, S., et al., *Overview of Virus Metagenomic Classification Methods and Their Biological Applications*. Front Microbiol, 2018. **9**: p. 749.
13. Brinkmann, A., et al., *Proficiency Testing of Virus Diagnostics Based on Bioinformatics Analysis of Simulated In Silico High-Throughput Sequencing Data Sets*. J Clin Microbiol, 2019. **57**(8).
14. Lopez-Labrador F.X., B.J.R., Fischer N., Harvala H., Van Boheemen S., Cinek O, Sayiner A, Vasehus Madsen T, Auvinen E. et al., *Recommendations for the introduction of metagenomic high-throughput sequencing in clinical virology, part I: wet lab procedure*. J Clin Virol, 2020; Dec.
15. Kalpoe, J.S., et al., *Validation of clinical application of cytomegalovirus plasma DNA load measurement and definition of treatment criteria by analysis of correlation to antigen detection*. J Clin Microbiol, 2004. **42**(4): p. 1498-504.
16. Read, S.J. and J.B. Kurtz, *Laboratory diagnosis of common viral infections of the central nervous system by using a single multiplex PCR screening assay*. J Clin Microbiol, 1999. **37**(5): p. 1352-5.
17. Lankester, A.C., et al., *Epstein-Barr virus (EBV)-DNA quantification in pediatric allogeneic stem cell recipients: prediction of EBV-associated lymphoproliferative disease*. Blood, 2002. **99**(7): p. 2630-1.

18. Loens, K., et al., *Performance of different mono- and multiplex nucleic acid amplification tests on a multipathogen external quality assessment panel*. J Clin Microbiol, 2012. **50**(3): p. 977-87.
19. Morfopoulou, S., et al., *Deep sequencing reveals persistence of cell-associated mumps vaccine virus in chronic encephalitis*. Acta Neuropathol, 2017. **133**(1): p. 139-147.
20. van Rijn, A.L., et al., *The respiratory virome and exacerbations in patients with chronic obstructive pulmonary disease*. PLoS One, 2019. **14**(10): p. e0223952.
21. Carbo, E.C., et al., *Improved diagnosis of viral encephalitis in adult and pediatric hematological patients using viral metagenomics*. J Clin Virol, 2020. **130**: p. 104566.
22. [https://www.ncbi.nlm.nih.gov/assembly/GCF\\_000001405.26/](https://www.ncbi.nlm.nih.gov/assembly/GCF_000001405.26/) (Accessed July).
23. B. Langmead, S.L.S., Fast gapped-read alignment with Bowtie 2, Nat. Methods and h.d.o.n. 9 (4) (2012) 357–359, Apr.
24. Amid, C., et al., *The COMPARE Data Hubs*. Database-the Journal of Biological Databases and Curation, 2019: p.1-14.
25. Kim, D., et al., *Centrifuge: rapid and sensitive classification of metagenomic sequences*. Genome Res, 2016. **26**(12): p. 1721-1729.
26. Alawi, M., et al., *DAMIAN: an open source bioinformatics tool for fast, systematic and cohort based analysis of microorganisms in diagnostic samples*. Sci Rep, 2019. **9**(1): p. 16841.
27. <https://sourceforge.net/projects/damian-pd>.
28. Buchfink, B., C. Xie, and D.H. Huson, *Fast and sensitive protein alignment using DIAMOND*. Nat Methods, 2015. **12**(1): p. 59-60.
29. <https://www.dnastar.com/software/lasergene/>.
30. Fernandes, J.F., et al., *Unbiased metagenomic next-generation sequencing of blood from hospitalized febrile children in Gabon*. Emerg Microbes Infect, 2020. **9**(1): p. 1242-1244.
31. Vilsker, M., et al., *Genome Detective: an automated system for virus identification from high-throughput sequencing data*. Bioinformatics, 2019. **35**(5): p. 871-873 [www.genomedetective.com](http://www.genomedetective.com).
32. <https://github.com/DennisSchmitz/Jovian>.
33. Rodriguez, C., et al., *Pathogen identification by shotgun metagenomics of patients with necrotizing soft-tissue infections*. Br J Dermatol, 2019.
34. Morfopoulou, S. and V. Plagnol, *Bayesian mixture analysis for metagenomic community profiling*. Bioinformatics, 2015. **31**(18): p. 2930-8.
35. <https://cran.r-project.org/web/packages/metaMix/index.html>.
36. Minot, S.S., *One Codex: a sensitive and accurate data platform for genomic microbial identification*. bioRxiv, 2015.
37. Scheuch, M., D. Hoper, and M. Beer, *RIEMS: a software pipeline for sensitive and comprehensive taxonomic classification of reads from metagenomics datasets*. BMC Bioinformatics, 2015. **16**: p. 69.
38. <https://github.com/EBI-COMMUNITY/fli-RIEMS>.
39. Flygare, S., et al., *Taxonomer: an interactive metagenomics analysis portal for universal pathogen detection and host mRNA expression profiling*. Genome Biol, 2016. **17**(1): p. 111.
40. <https://github.com/medvir/VirMet> and <https://github.com/medvir/shiny-server/tree/master/NGS/VirMetRunAnalysis>.

41. O'Leary, N.A., et al., *Reference sequence (RefSeq) database at NCBI: current status, taxonomic expansion, and functional annotation*. Nucleic Acids Res, 2016. **44**(D1): p. D733-45.
42. Benson, D.A., et al., *GenBank*. Nucleic Acids Res, 2011. **39**(Database issue): p. D32-7.
43. Sczyrba, A., et al., *Critical Assessment of Metagenome Interpretation—a benchmark of metagenomics software*. Nat Methods, 2017. **14**(11): p. 1063-1071.
44. Bharucha, T., et al., *STROBE-metagenomics: a STROBE extension statement to guide the reporting of metagenomics studies*. Lancet Infect Dis, 2020. **20**(10): p. e251-e260.
45. Nurk, S., et al., *metaSPAdes: a new versatile metagenomic assembler*. Genome Res, 2017. **27**(5): p. 824-834.
46. <https://viralzone.expasy.org/8676>.
47. Bolger, A.M., M. Lohse, and B. Usadel, *Trimmomatic: a flexible trimmer for Illumina sequence data*. Bioinformatics, 2014. **30**(15): p. 2114-20.
48. <https://github.com/sib-swiss/virusscan>.
49. Carbo EC, B.E., Karelioti E, Sidorov I, Feltkamp MCW, Von dem Borne PA, Verschuuren Jan JGM, Kroes ACM, Claas ECJ, De Vries JJC, *Improved diagnosis of viral encephalitis in adults and pediatric hematological patients using viral metagenomics*. bioRxiv, 2020.
50. Mongkolrattanothai, K. and J. Dien Bard, *The utility of direct specimen detection by Sanger sequencing in hospitalized pediatric patients*. Diagn Microbiol Infect Dis, 2017. **87**(2): p. 100-102.
51. Kawada, J., et al., *Identification of Viruses in Cases of Pediatric Acute Encephalitis and Encephalopathy Using Next-Generation Sequencing*. Sci Rep, 2016. **6**: p. 33452.
52. Rodriguez, C., et al., *Pathogen identification by shotgun metagenomics of patients with necrotizing soft-tissue infections*. Br J Dermatol, 2020. **183**(1): p. 105-113.
53. Rodriguez, C., et al., *Fatal Measles Inclusion-Body Encephalitis in Adult with Untreated AIDS, France*. Emerg Infect Dis, 2020. **26**(9): p. 2231-2234.
54. Rodriguez, C., et al., *Fatal Encephalitis Caused by Cristoli Virus, an Emerging Orthobunyavirus, France*. Emerg Infect Dis, 2020. **26**(6): p. 1287-1290.
55. De Vries JJC, et al. **Recommendations for the introduction of next-generation sequencing in clinical virology, part II: bioinformatic analysis and reporting**. J Clin Virol **2021**, **104812** <https://doi.org/10.1016/j.jcv.2021.104812>

Figure 1. Workflow of bioinformatic analysis of (viral) metagenomics data with the pipelines and classification tools used by participants in the current study.

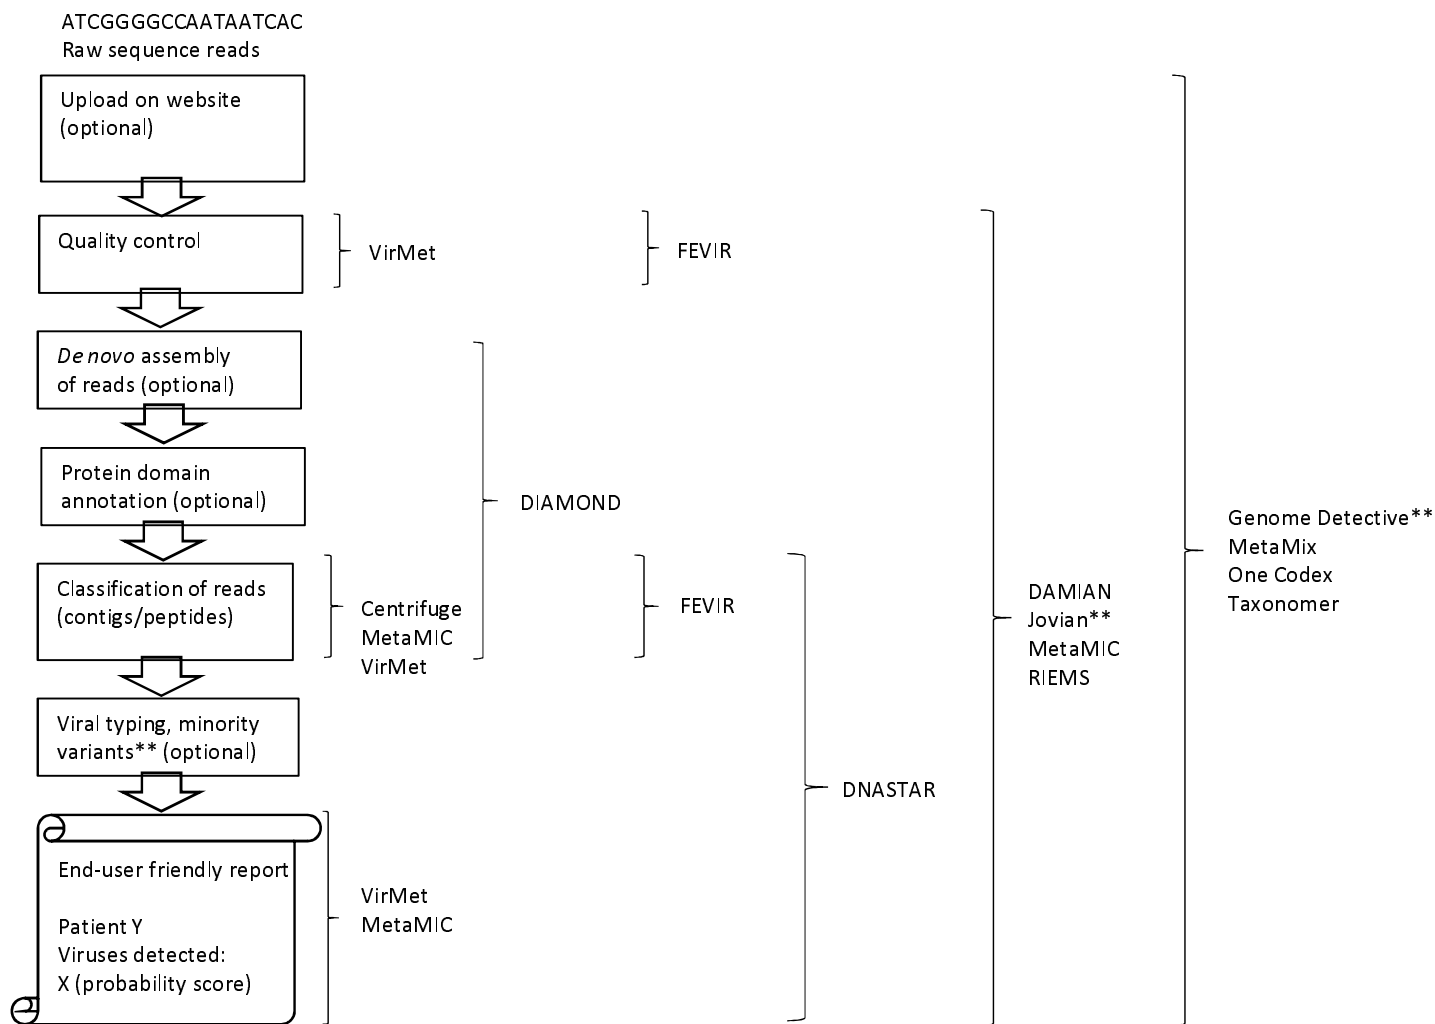



Table 2. Qualitative and quantitative results: raw sequence read count categories of the PCR positive viruses reported by the metagenomic pipelines using datasets from 13 clinical samples, per classification tool (complete pipeline details can be found in table 1). CSF; cerebrospinal fluid, NP; nasopharyngeal, BAL; bronchoalveolar lavage, and in legend: ND; not detected

|                            | Encephalitis    |                               |                               |                                          |                      |                      |                        | Respiratory disease |                 |                    |                                   |                     | Fever               |                                               |                                          |
|----------------------------|-----------------|-------------------------------|-------------------------------|------------------------------------------|----------------------|----------------------|------------------------|---------------------|-----------------|--------------------|-----------------------------------|---------------------|---------------------|-----------------------------------------------|------------------------------------------|
| Samples                    | 1<br>CSF        | 2<br>CSF<br>Capture<br>probes | 3<br>CSF<br>Capture<br>probes | 4<br>CSF<br>Capture<br>probes            | 5<br>Brain<br>biopsy | 6<br>Brain<br>biopsy | 7<br>Brain<br>biopsy   | 8<br>NP<br>swab     | 9<br>NP<br>swab | 10<br>NP<br>swab   | 11<br>BAL<br>(mixed<br>infection) |                     | 12<br>Nasal<br>wash | 13<br>Plasma<br>(mixed infection)             |                                          |
| PCR<br>(Cq-value/<br>c/ml) | HHV-6<br>(25.9) | HHV-6<br>(24.6)               | Enterovirus<br>(26.3)         | EBV<br>(29.1/<br>3.8 log <sub>10</sub> ) | Mumps<br>(23,8)      | CoV-OC43<br>(24)     | Astrovirus VA1<br>(25) | Inf-A<br>(24.8)     | PIV-3<br>(31.5) | CoV-NL63<br>(28.6) | CoV-NL63<br>(24.2)                | CoV-HKU-1<br>(28.3) | HKU-1<br>(24.4)     | Adenovirus<br>(28.8/<br>5 log <sub>10</sub> ) | EBV<br>(32.8/<br>3.9 log <sub>10</sub> ) |
| <b>Centrifuge</b>          |                 |                               |                               |                                          |                      |                      |                        |                     |                 |                    |                                   |                     |                     |                                               |                                          |
| <b>DAMIAN</b>              |                 |                               |                               |                                          |                      |                      |                        |                     |                 |                    |                                   |                     |                     |                                               |                                          |
| <b>DIAMOND</b>             |                 |                               |                               |                                          |                      |                      |                        |                     |                 |                    |                                   |                     |                     |                                               |                                          |
| <b>DNASTAR</b>             |                 |                               |                               |                                          |                      |                      |                        |                     |                 |                    |                                   |                     |                     |                                               |                                          |
| <b>FEVIR</b>               |                 |                               |                               |                                          |                      |                      |                        |                     |                 |                    |                                   |                     |                     |                                               |                                          |
| <b>Genome Detective</b>    |                 |                               |                               |                                          |                      |                      |                        |                     |                 |                    |                                   |                     |                     |                                               |                                          |
| <b>Jovian</b>              |                 |                               |                               |                                          |                      |                      |                        |                     |                 |                    |                                   |                     |                     |                                               |                                          |
| <b>MetaMIC</b>             |                 |                               |                               |                                          |                      |                      |                        |                     |                 |                    |                                   |                     |                     |                                               |                                          |
| <b>MetaMix</b>             |                 |                               |                               |                                          |                      |                      |                        |                     |                 |                    |                                   |                     |                     |                                               |                                          |
| <b>One Codex</b>           |                 |                               |                               |                                          |                      |                      |                        |                     |                 |                    |                                   |                     |                     |                                               |                                          |
| <b>RIEMS</b>               |                 |                               |                               |                                          |                      |                      |                        |                     |                 |                    |                                   |                     |                     |                                               |                                          |
| <b>Taxonomer</b>           |                 |                               |                               |                                          |                      |                      |                        |                     |                 |                    |                                   |                     |                     |                                               |                                          |
| <b>VirMet</b>              |                 |                               |                               |                                          |                      |                      |                        |                     |                 |                    |                                   |                     |                     |                                               |                                          |

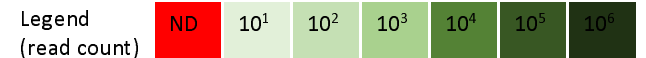

Figure 2. Sequence read counts (Y) versus RT-PCR Cq values (X) of the PCR positive viruses using datasets from 13 clinical samples, per classification tool with read counts reported by the participants (complete pipeline details can be found in table 1). Each vertical series of dots represents one clinical sample.

The different wet lab methods used are marked (^ mRNA sequencing, \$ RNA/DNA sequencing, and #: a captured approach using probes targeting vertebrate viruses). RPKM; reads per kilobase of genome per million mapped reads

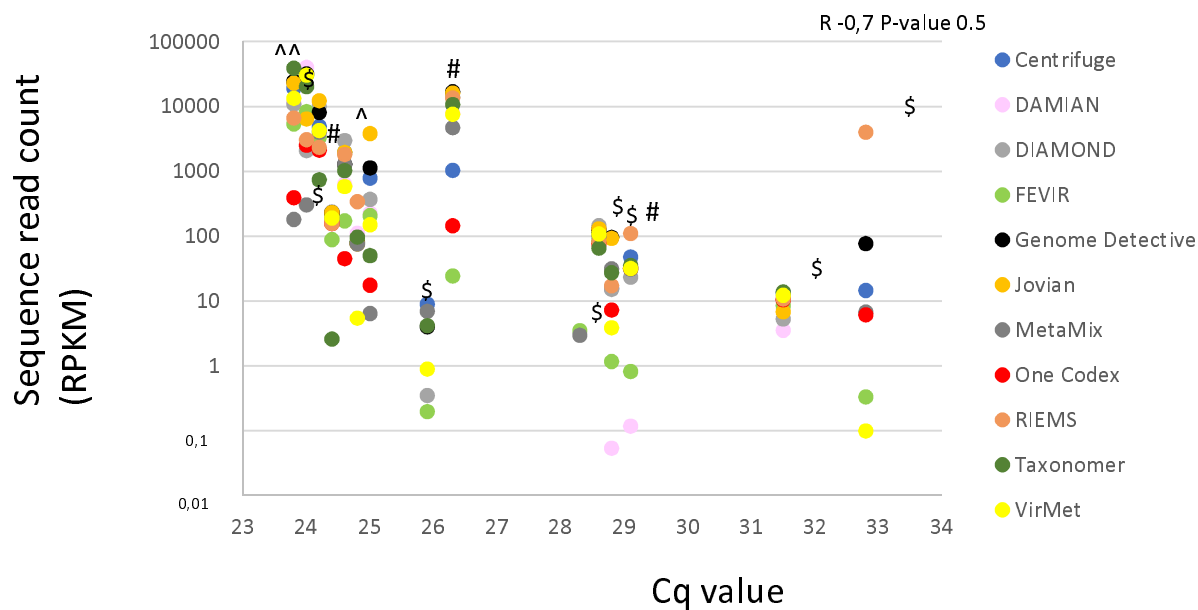

Figure 3. (Taxonomic) level of classification and typing of the pathogenic viruses identified using the combination of tools and databases, as reported by participating diagnostic laboratories. Depicted are the number of target viruses per classification level.

RefSeq; NCBI's RefSeq data base (or an adapted version), NT; NCBI's nucleotide database (or an adapted version); LCA; lowest common ancestor.

\*Taxonomic assignment method described in [25,26]

No. of target viruses  
per classification level reported

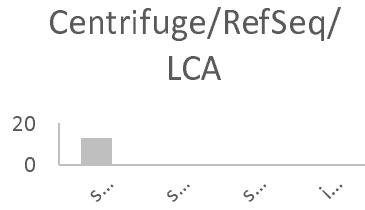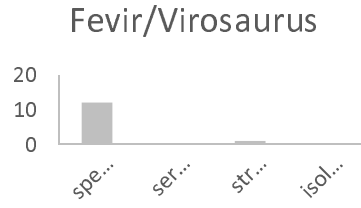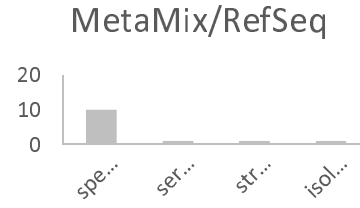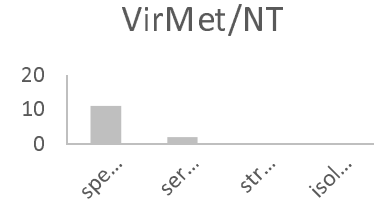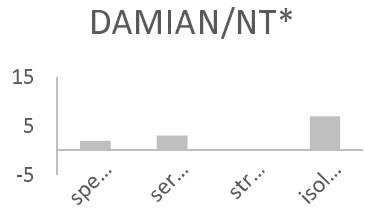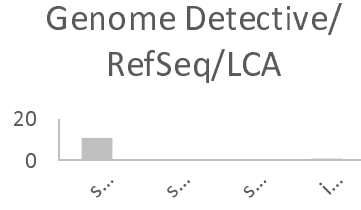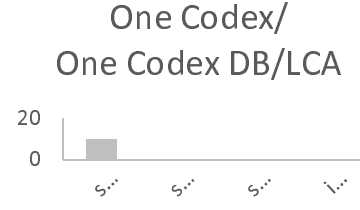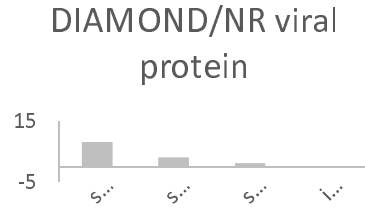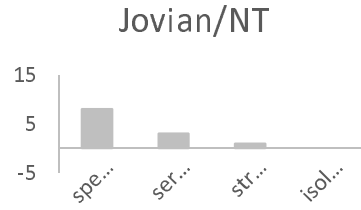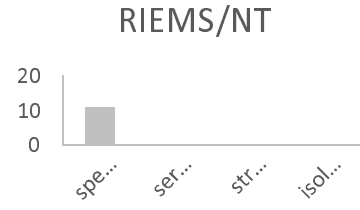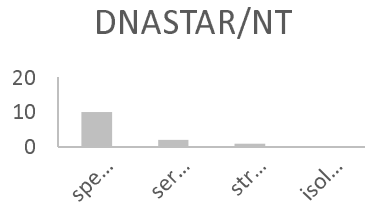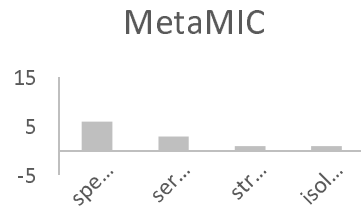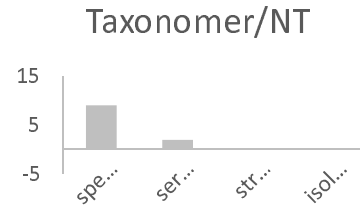

Figure 4. Sensitivity and positive predictive value based on the hits reported by the participants, for the different pipelines/classification tools.

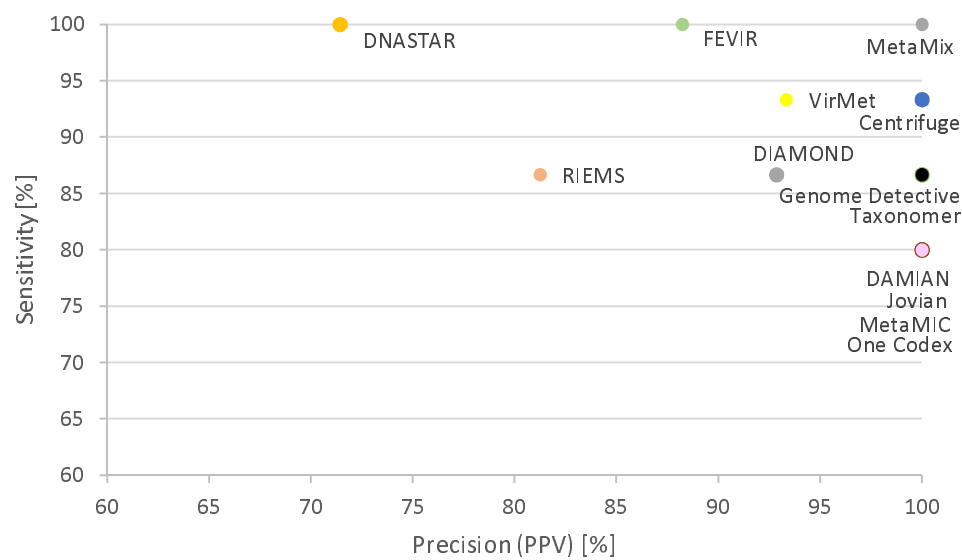

Supplementary Figure S1. User-friendly output formats of metagenomic pipelines and tools tested, command line formats excluded.

### Genome Detective

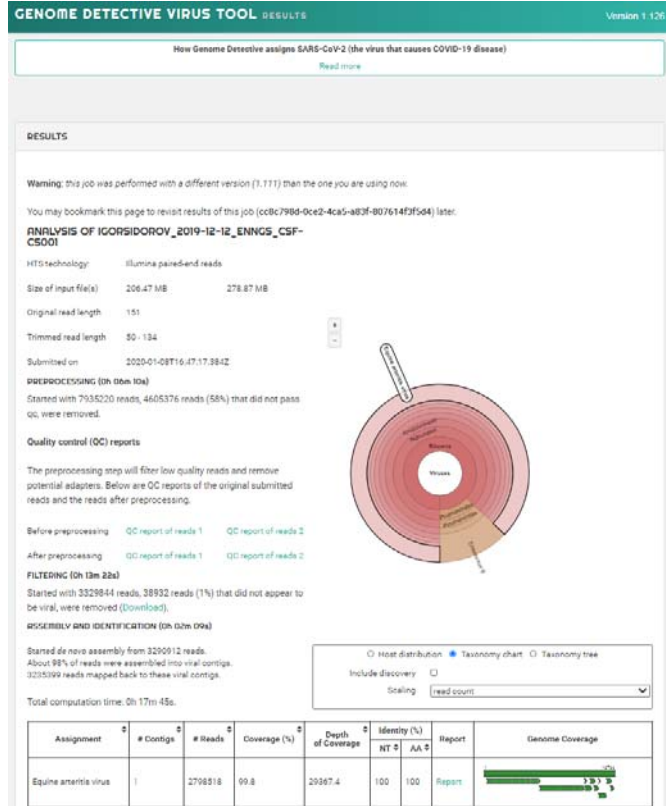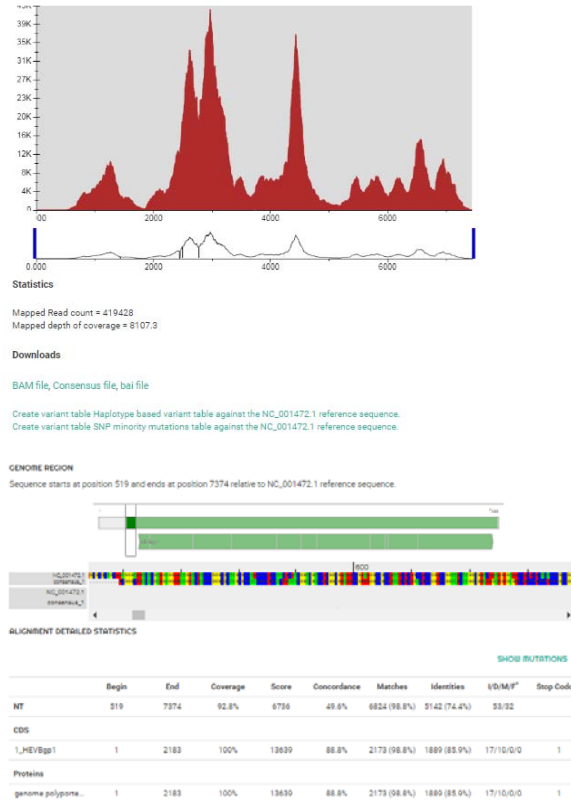

### Centrifuge/Krona plots

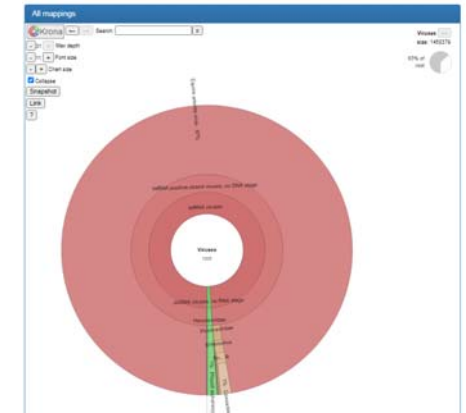





Metamix/Bluebee

## RNA-Seq Encephalitis Diagnostics

### Pipeline Run Details

User Reference: **GOSHmeta3** Pipeline: **GOSH RNA-Seq Encephalitis Diagnostics 1.2.0**  
 Request Date: **Sep, 10 2019 10:58:33** Start Date: **Sep, 10 2019 11:00:23**  
 Duration: **14h 58m 33s** Requestor: **Dr. Julianne Brown**  
 User Tags:

### Input Data

[UCLGNS1212-13M1974-B\\_S7\\_R1\\_001.fastq.gz](#)

File Name: **UCLGNS1212-13M1974-B\_S7\_R1\_001.fastq.gz** File Path: **UCLGNS1212-13M1974-B\_S7\_R1\_001.fastq.gz**  
 Size: **5.57 GB** Format: **FASTQ**  
 Creation Date: **Sep, 10 2019 08:55:02** User Tags:  
 Run In Tags: **GOSHmeta3** Connector Tags: **Upload**

[UCLGNS1212-13M1974-B\\_S7\\_R2\\_001.fastq.gz](#)

File Name: **UCLGNS1212-13M1974-B\_S7\_R2\_001.fastq.gz** File Path: **UCLGNS1212-13M1974-B\_S7\_R2\_001.fastq.gz**  
 Size: **5.7 GB** Format: **FASTQ**  
 Creation Date: **Sep, 10 2019 08:47:18** User Tags:  
 Run In Tags: **GOSHmeta3** Connector Tags: **Upload**

### Results

| *taxonID* | *scientName* | *finalAssignments*      | *poster_prob* | *log10BP* |                  |
|-----------|--------------|-------------------------|---------------|-----------|------------------|
| *8*       | *unknown*    | *unknown*               | 30490         | 1         | NA               |
| *7*       | *9606*       | *Homo sapiens*          | 28586         | 1         | 28977.6477200774 |
| *6*       | *645687*     | *Astrovirus VA1*        | 2423          | 1         | 9562.99329606601 |
| *1*       | *10090*      | *Mus musculus*          | 536           | 1         | 684.019570605247 |
| *2*       | *28090*      | *Acinetobacter lwoffii* | 25            | 1         | 135.6328430578   |
| *4*       | *469*        | *Acinetobacter*         | 19            | 0.99      | 57.62766626128   |
| *3*       | *43675*      | *Rothia mucilaginosa*   | 14            | 1         | 109.876588922052 |
| *5*       | *488*        | *Neisseria mucosa*      | 11            | 0.94      | 14.9840642137569 |

List of detected species (presentSpecies\_assignedReads.tsv)

Command line (CLC Genomics Workbench) PDF coverage plot

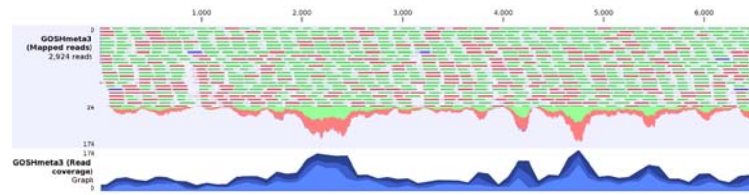

### RIEMS

| Family       | Species                                   | SKTax | Fam Tax | Tax     | counts | Pre-Filtering | Mapping | Mapping2 | Assembly | Ident Assembly | Metablast vs atdb | Ident Metablast vs atdb | Blastx vs Organism | Ident Blastx vs Organism | Blastx vs atdb | Ident Blastx vs atdb |
|--------------|-------------------------------------------|-------|---------|---------|--------|---------------|---------|----------|----------|----------------|-------------------|-------------------------|--------------------|--------------------------|----------------|----------------------|
| Pithoviridae | <i>Pithovirus LCPAC102</i>                | 10239 | 2023203 | 2506587 | 4      | 0             | 0       | 0        | 0        | 0              | 0                 | 0                       | 0                  | 0                        | 4              | 76.92-88             |
|              | <i>Pithovirus LCPAC104</i>                | 10239 | 2023203 | 2506589 | 2      | 0             | 0       | 0        | 0        | 0              | 0                 | 0                       | 0                  | 0                        | 2              | 76.54-78             |
|              | <i>Impatiens necrotic spot tospovirus</i> | 10239 | 1980416 | 1933294 | 1      | 0             | 0       | 0        | 0        | 0              | 0                 | 0                       | 0                  | 0                        | 1              | 75.26                |
| Nudiviridae  | <i>Tomato spotted wilt tospovirus</i>     | 10239 | 1980416 | 1933298 | 1      | 0             | 0       | 0        | 0        | 0              | 0                 | 0                       | 0                  | 0                        | 1              | 72.36                |
|              | <i>Heliothis zea nudiviruses</i>          | 10239 | 1511852 | 29250   | 1      | 0             | 0       | 0        | 0        | 0              | 0                 | 0                       | 0                  | 0                        | 1              | 81.82                |
| Mimiviridae  | <i>Hokovirus HKV1</i>                     | 10239 | 549779  | 1977638 | 5      | 0             | 0       | 0        | 0        | 0              | 0                 | 0                       | 0                  | 0                        | 5              | 71.74-85.19          |
|              | <i>Indivirus INVI</i>                     | 10239 | 549779  | 1977633 | 1      | 0             | 0       | 0        | 0        | 0              | 0                 | 0                       | 0                  | 0                        | 1              | 86.96                |
|              | <i>Bodo saltans virus</i>                 | 10239 | 549779  | 2024698 | 1      | 0             | 0       | 0        | 0        | 0              | 0                 | 0                       | 0                  | 0                        | 1              | 88.89                |
|              | <i>Typanvirus soda lake</i>               | 10239 | 549779  | 2126985 | 1      | 0             | 0       | 0        | 0        | 0              | 0                 | 0                       | 0                  | 0                        | 1              | 84.48                |
|              | <i>Mimivirus sp SH</i>                    | 10239 | 549779  | 2496520 | 1      | 0             | 0       | 0        | 0        | 0              | 0                 | 0                       | 0                  | 0                        | 1              | 80                   |
|              | <i>Mimivirus LCMAC01</i>                  | 10239 | 549779  | 2506608 | 1      | 0             | 0       | 0        | 0        | 0              | 0                 | 0                       | 0                  | 0                        | 1              | 77.53                |
|              | <i>Mimivirus LCMAC02</i>                  | 10239 | 549779  | 2506609 | 1      | 0             | 0       | 0        | 0        | 0              | 0                 | 0                       | 0                  | 0                        | 1              | 87.23                |
|              | <i>Alphapapillomavirus 9</i>              | 10239 | 151340  | 337041  | 1      | 0             | 0       | 0        | 0        | 0              | 0                 | 0                       | 0                  | 0                        | 1              | 90.7                 |
|              | <i>Human astrovirus</i>                   | 10239 | 39733   | 1602211 | 1421   | 0             | 1125    | 111      | 129      | 95.19-100      | 31                | 88.14-100               | 10                 | 82.35-94.84              | 15             | 86.28-100            |
|              | <i>Mamastrovirus 9</i>                    | 10239 | 39733   | 1868658 | 8      | 0             | 0       | 0        | 0        | 0              | 2                 | 100                     | 4                  | 96.06-98.65              | 2              | 78.33-89.47          |
|              | <i>Mamastrovirus 9</i>                    | 10239 | 39733   | 1239573 | 6      | 0             | 0       | 0        | 0        | 0              | 6                 | 94.02-100               | 0                  | 0                        | 0              | 0                    |

### OneCodex

| Organism Name             | Rank    | Tax ID  | % of All Reads | # of Reads | # of Reads (w/ Children) | Est. Depth | Est. Abundance |
|---------------------------|---------|---------|----------------|------------|--------------------------|------------|----------------|
| Mumps rubulavirus         | species | 1979165 | 0.606542997    | 13511      | 206072                   | 1665.2489  | 0.999342612    |
| Cutibacterium acnes       | species | 1747    | 0.002873122    | 64         | 73                       | 0.2731787  | 0.000163939    |
| Pseudomonas fluorescens   | species | 294     |                |            | 24                       | 0.0082842  | 4.97146E-06    |
| Pseudomonas putida        | species | 303     |                |            | 7                        | 0.000401   | 2.4064E-07     |
| Ralstonia pickettii       | species | 329     | 0.00017957     | 4          | 19                       | 0.0158012  | 9.48256E-06    |
| Xanthomonas campestris    | species | 339     | 0.001616131    | 36         | 36                       | 0.0009556  | 5.73464E-07    |
| Methylobium extorquens    | species | 408     |                |            | 6                        | 0.0007724  | 4.63546E-07    |
| Moraxella nonliquefaciens | species | 478     | 0.002424197    | 54         | 54                       | 0.0029298  | 1.75824E-06    |
| Moraxella sp.             | species | 479     | 0.000808066    | 18         | 18                       |            |                |

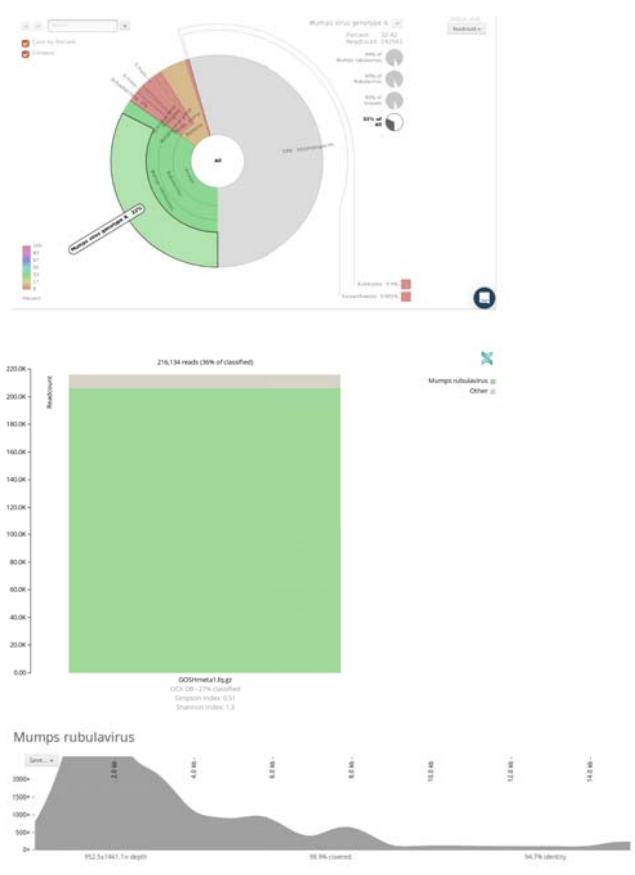

### Taxonomer

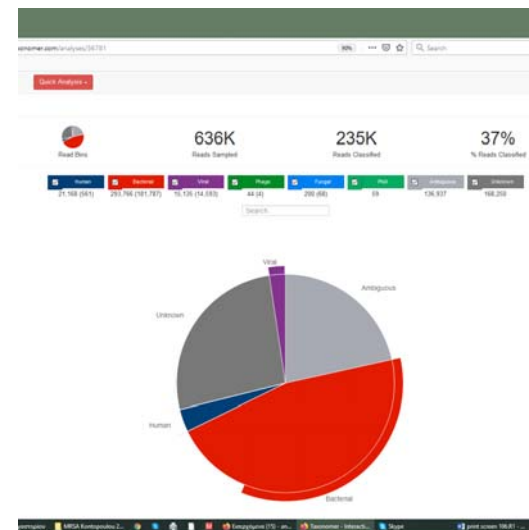

Jovian

## VirMet Report

NA

### A. Filterable spreadsheets

| Sample Name | ID            | Y      | taxID | T | tax_name     | Y | tax_e_val | species | Y | genus | Y | family   |
|-------------|---------------|--------|-------|---|--------------|---|-----------|---------|---|-------|---|----------|
| Z_20688_AG  | NODE_1_ser_1  | 1671   |       |   | EFibobacter  |   |           |         |   |       |   | im Bifid |
| Z_20688_AG  | NODE_2_ser_1  | 387276 |       |   | Bacteroides  |   |           |         |   |       |   | im Bifid |
| Z_20688_AG  | NODE_3_ser_1  | 1679   |       |   | EFibobacter  |   |           |         |   |       |   | im Bifid |
| Z_20688_AG  | NODE_4_ser_1  | 1679   |       |   | EFibobacter  |   |           |         |   |       |   | im Bifid |
| Z_20688_AG  | NODE_5_ser_1  | 1679   |       |   | EFibobacter  |   |           |         |   |       |   | im Bifid |
| Z_20688_AG  | NODE_6_ser_1  | 387276 |       |   | Bacteroides  |   |           |         |   |       |   | im Bifid |
| Z_20688_AG  | NODE_7_ser_1  | 122929 |       |   | Nonionia G   |   |           |         |   |       |   | Calc     |
| Z_20688_AG  | NODE_8_ser_1  | 391504 |       |   | EFibobacter  |   |           |         |   |       |   | im Bifid |
| Z_20688_AG  | NODE_9_ser_1  | 821    |       |   | Bacteroides  |   |           |         |   |       |   | im Bifid |
| Z_20688_AG  | NODE_10_ser_1 | 391504 |       |   | EFibobacter  |   |           |         |   |       |   | im Bifid |
| Z_20688_AG  | NODE_11_ser_1 | 12563  |       |   | Human spiro  |   |           |         |   |       |   | Floor    |
| Z_20688_AG  | NODE_12_ser_1 | 821    |       |   | Bacteroides  |   |           |         |   |       |   | im Bifid |
| Z_20688_AG  | NODE_13_ser_1 | 1695   |       |   | EFibobacter  |   |           |         |   |       |   | im Bifid |
| Z_20688_AG  | NODE_14_ser_1 | 565506 |       |   | Human spiro  |   |           |         |   |       |   | Floor    |
| Z_20688_AG  | NODE_15_ser_1 | 155508 |       |   | uncultured c |   |           |         |   |       |   | nar      |
| Z_20688_AG  | NODE_16_ser_1 | 218916 |       |   | EFibobacter  |   |           |         |   |       |   | im Bifid |

### B. Heatmaps

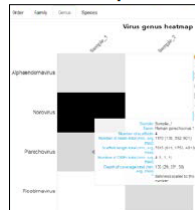

### C. MultiQC report

| Sample Name     | Insert Size | % Aligned | % Dropped | % GC | Length | M Bases |
|-----------------|-------------|-----------|-----------|------|--------|---------|
| R15-06_S108     | 256 bp      | 3.1%      |           |      |        |         |
| R15-06_S108_R1  |             | 7.5%      |           |      | 101 bp | 1.1     |
| R15-06_S108_R2  |             | 40%       |           |      | 101 bp | 1.1     |
| R15-06_S108_R01 |             | 38%       |           |      | 114 bp | 1.4     |
| R15-06_S108_R02 |             | 39%       |           |      | 112 bp | 1.4     |
| R15-06_S108_R01 |             | 40%       |           |      | 116 bp | 0.1     |
| R15-06_S108_R02 |             | 41%       |           |      | 113 bp | 0.1     |
| R15-07_S109     | 170 bp      | 1.1%      |           |      |        |         |
| R15-07_S109_R1  |             | 8.5%      |           |      | 101 bp | 1.1     |

### D. Krona plot

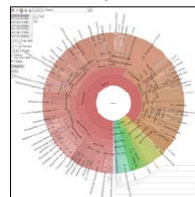

### E. IGVs scaffold alignment viewer for in-depth analyses

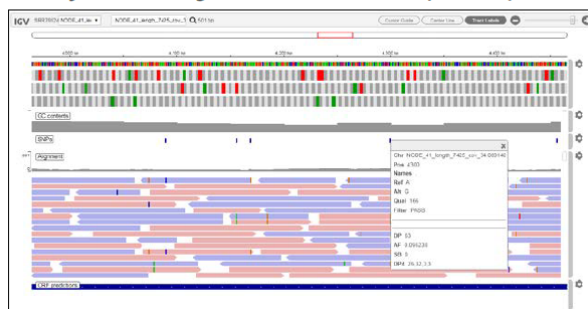

### Run Information

|                                  |                                    |
|----------------------------------|------------------------------------|
| Run name                         | 191010_M01274_0212_000000000-ENNR1 |
| Sample name                      | ENNGS_7059_CSF_RNA_S01CAP          |
| Quality-filtered reads (DNA/RNA) | NA/3.556 M                         |
| Report date                      | 2020-02-27                         |
| Analyzed by                      | Maryam Zaheri                      |

### Domain Level Taxonomy Profile

| domain       | reads   | percent | abundance |
|--------------|---------|---------|-----------|
| human        | 0       | 0.000   | +         |
| bacterial    | 4298    | 0.121   | +         |
| fungal       | 0       | 0.000   | +         |
| bovine       | 4744    | 0.133   | +         |
| viral        | 2017278 | 56.722  | +++++     |
| undetermined | 1530103 | 43.024  | +++++     |

### Detected<sup>1</sup> Virus Species

| species                   | RNA workflow | total   |
|---------------------------|--------------|---------|
| Equine arteritis virus    | 1396102      | 1396102 |
| Enterovirus B             | 201611       | 201611  |
| Phocid alphaherpesvirus 1 | 15879        | 15879   |
| Human metapneumovirus     | 21           | 21      |

<sup>1</sup>excluding phages and endogenous retroviruses

### Rejected Virus Species

| species                     | RNA workflow | total  |
|-----------------------------|--------------|--------|
| Cynomolgus cytomegalovirus  | 340886       | 340886 |
| Caulobacter phage Cer29     | 61874        | 61874  |
| Enterovirus C               | 507          | 507    |
| Feline leukemia virus       | 147          | 147    |
| RD114 retrovirus            | 108          | 108    |
| Staphylococcus phage Andhra | 67           | 67     |
| Human mastadenovirus C      | 59           | 59     |
| Enterovirus J               | 6            | 6      |
| Enterovirus A               | 4            | 4      |
| Escherichia virus phiX174   | 4            | 4      |
| Enterovirus D               | 2            | 2      |
| Human betaherpesvirus 6A    | 1            | 1      |

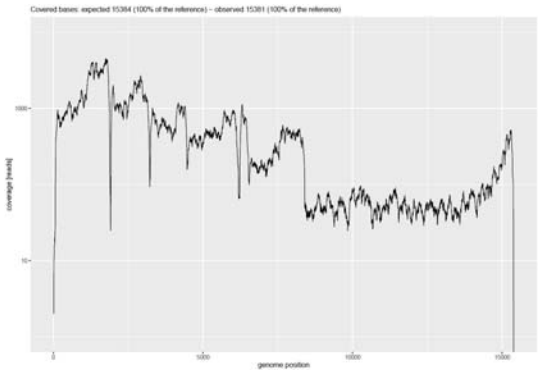

PDF coverage plot (command line)
